# Supplementary material
Source: PubMed Central journal article supplement (PMC10391207)

## **SUPPLEMENTARY MATERIALS**

### **Perceived appropriateness of medication adherence incentives**

Tessa J Hastings, PhD; Natalie S Hohmann, PharmD, PhD; Ruth Jeminiwa, PhD; Richard A Hansen, PhD; Jingjing Qian, PhD; and Kimberly B Garza, PharmD, MBA, PhD

**Supplementary Figure 1. Perceived Appropriateness of Incentives for Medication Adherence**

**Supplementary Figure 2. Perceived Appropriateness of Financial Incentive Source**

## Supplementary Figure 1. Perceived Appropriateness of Incentives for Medication Adherence

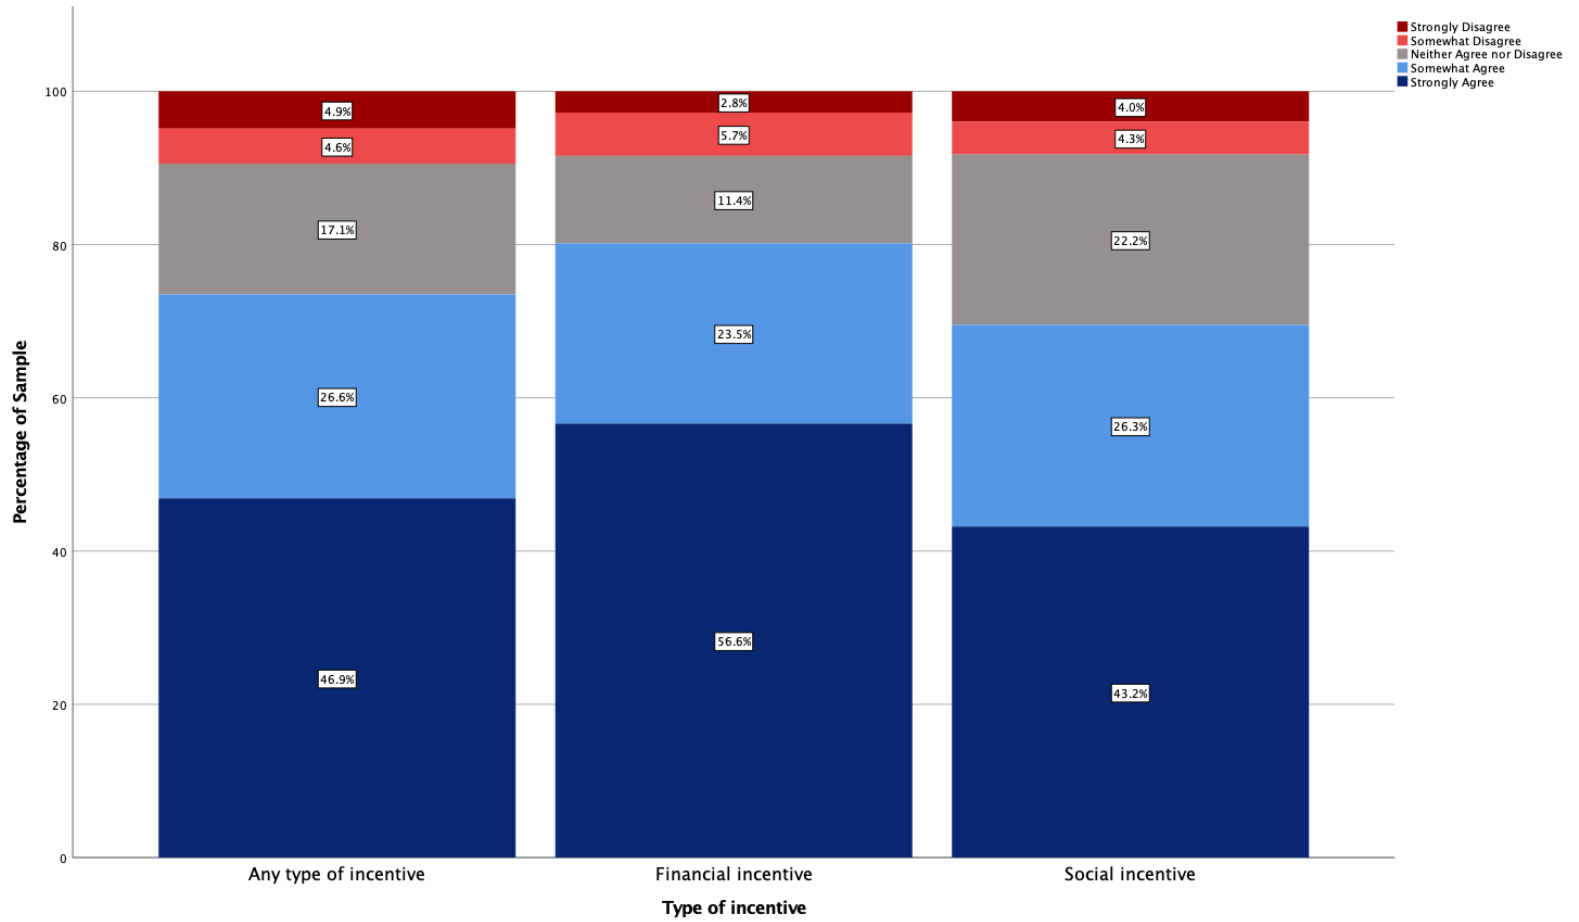

**Supplementary Figure 2. Perceived Appropriateness of Financial Incentive Source**

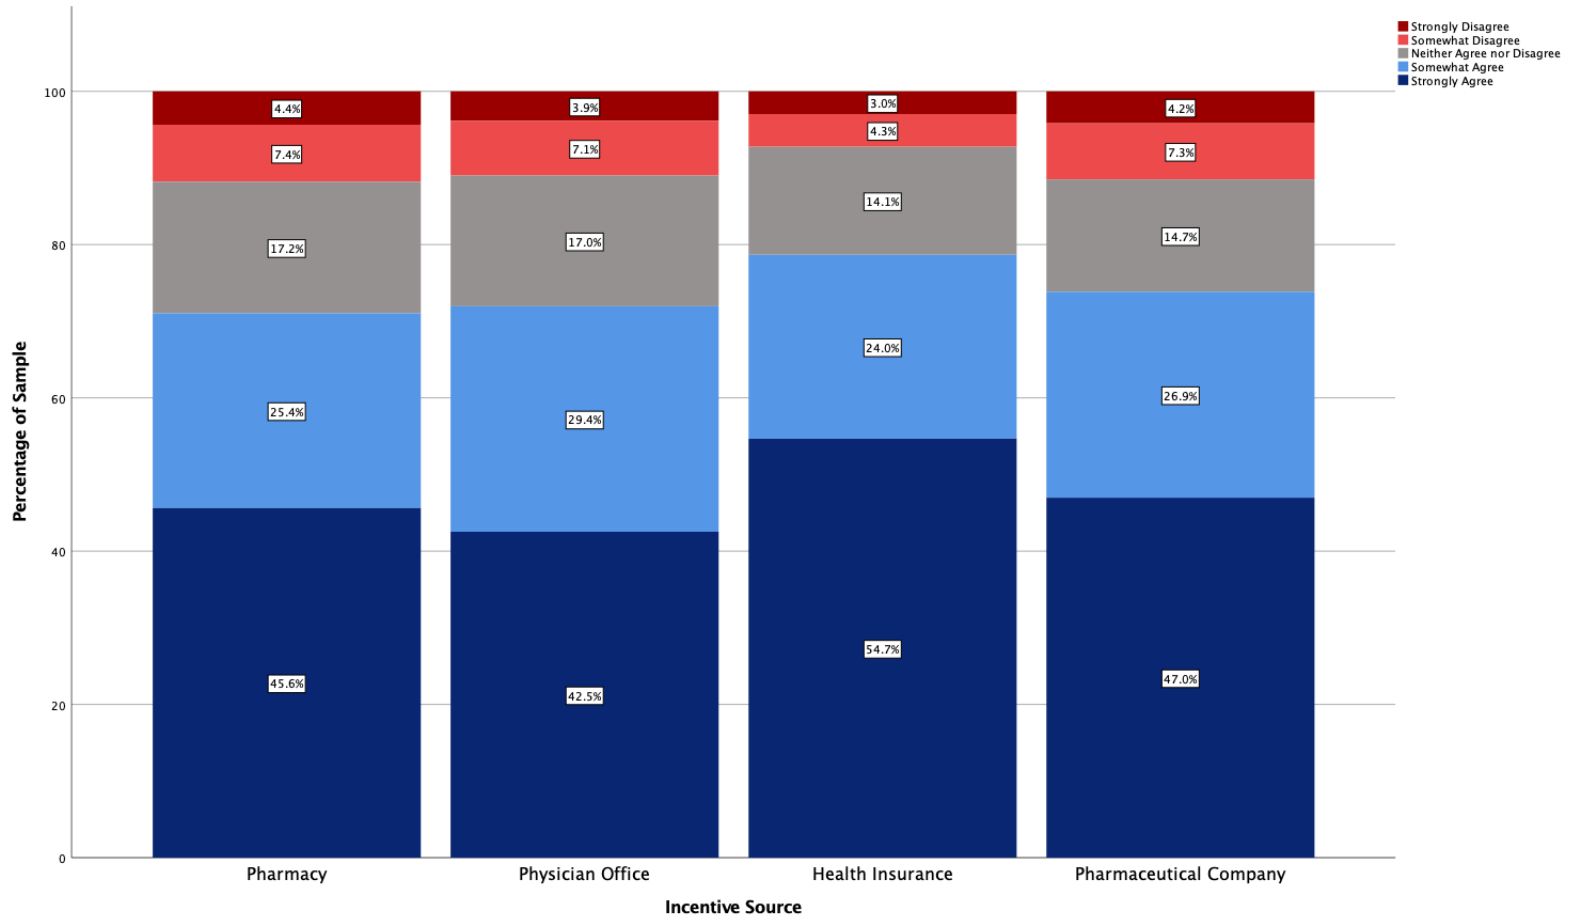

Supplement: jmcp.2021.27.6.772_s001.pdf [file jmcp.2021.27.6.772_s001.pdf]
